# Supplementary material
Source: PubMed Central journal article supplement (PMC3700299)
Supplement: JVI.00865-13_zjv999097784so1.pdf [file JVI.00865-13_zjv999097784so1.pdf]

Table S1: Characteristics of HIV<sup>+</sup> subjects enrolled per study group.

| Patient ID                              | Infection Stage <sup>1</sup> | Viral Load (VL) <sup>2</sup> |                   | Viral Set point <sup>3</sup><br>Log <sub>10</sub> | CD4 <sup>+</sup> T cell count <sup>2</sup><br>Cells/ $\mu$ l | CD4 Set point <sup>3</sup><br>Cells/ $\mu$ l | CD4<350 cells/ $\mu$ l during first year? <sup>3,4</sup> | HAART <sup>5</sup> | HLA haplotype |           |       |        |    |    |
|-----------------------------------------|------------------------------|------------------------------|-------------------|---------------------------------------------------|--------------------------------------------------------------|----------------------------------------------|----------------------------------------------------------|--------------------|---------------|-----------|-------|--------|----|----|
|                                         |                              | RNA copies/ml                | Log <sub>10</sub> |                                                   |                                                              |                                              |                                                          |                    | HLA-A         | HLA-B     | HLA-C |        |    |    |
| <b>Primary HIV Infection (PHI) N=44</b> |                              |                              |                   |                                                   |                                                              |                                              |                                                          |                    |               |           |       |        |    |    |
| NP01b                                   | V                            | 9,532                        | 4,0               | 3,6                                               | 590                                                          | 587                                          | NO                                                       | NO                 | 32            | 32        | 15    | 35     | 4  | 7  |
| NP02                                    | V                            | 2,707                        | 3,4               | 3,9                                               | 902                                                          | 600                                          | NO                                                       | NO                 | 1             | 3         | 35    | 37     | 4  | 6  |
| NP03                                    | VI                           | 8,613                        | 3,9               | 4,4                                               | 851                                                          | 758                                          | NO                                                       | NO                 | 2             | 36        | 7     | 42     | 7  | 7  |
| NP04                                    | V                            | 104                          | 2,0               | 2,5                                               | 602                                                          | 679                                          | NO                                                       | NO                 | 31            | 68        | 44    | 51     | 5  | 14 |
| NP05                                    | VI                           | 256,051                      | 5,4               | 4,8                                               | 797                                                          | 943                                          | NO                                                       | NO                 | 2             | 11/24/31* | 7     | 35     | 4  | 7  |
| NP06                                    | VI                           | 13,962                       | 4,1               | 4,6                                               | 577                                                          | 544                                          | NO                                                       | NO                 | 2             | 23        | 38    | 58     | 7  | 12 |
| NP07                                    | VI                           | 61,045                       | 4,8               | 4,4                                               | 595                                                          | 508                                          | NO                                                       | NO                 | 2             | 32        | 7.3   | 4901   | 7  | 7  |
| NP08                                    | V                            | 19,522                       | 4,3               | 4,2                                               | 525                                                          | 442                                          | NO                                                       | NO                 | 2             | 2         | 57    | 40CXJJ | 3  | 7  |
| NP09                                    | V                            | >500,000                     | >5,7              | 4,3                                               | 603                                                          | 490                                          | NO                                                       | NO                 | 2             | 68        | 14    | 51     | 1  | 8  |
| NP10                                    | VI                           | 258,015                      | 5,4               | 4,5                                               | 803                                                          | 670                                          | NO                                                       | NO                 | 1             | 26        | 1517  | 35.3   | 4  | 7  |
| NP11                                    | V                            | 455,417                      | 5,7               | 5,2                                               | 698                                                          | 685                                          | NO                                                       | NO                 | 11            | 32        | 44    | 58     | 4  | 5  |
| NP12                                    | VI                           | 17,420                       | 4,2               | 4,1                                               | 685                                                          | 402                                          | NO                                                       | NO                 | 2             | 68        | 15    | 40     | 3  | 8  |
| NP13                                    | V                            | 21,986                       | 4,3               | 3,4                                               | 609                                                          | 658                                          | NO                                                       | NO                 | 31            | 31        | 8     | 48     | 4  | 7  |
| NP14                                    | VI                           | 12361                        | 4,1               | 3,9                                               | 732                                                          | 764                                          | NO                                                       | NO                 | 31            | 31        | 44    | 51     | 4  | 15 |
| NP15                                    | VI                           | 9018                         | 4,0               | 3,5                                               | 587                                                          | 410                                          | NO                                                       | NO                 | 2             | 26        | 14    | 50     | 3  | 8  |
| NP16                                    | VI                           | 149                          | 2,2               | NA                                                | 786                                                          | 788                                          | NO                                                       | NO                 | 31            | 3/11*     | 8     | 40     | 3  | 7  |
| NP17                                    | VI                           | 508085                       | 5,7               | 4,7                                               | 851                                                          | 585                                          | NO                                                       | NO                 | 29            | 29        | 14    | 44     | 08 | 16 |
| NP18                                    | VI                           | 67660                        | 4,8               | NA                                                | 387                                                          | NA                                           | NO                                                       | NO                 | 26            | 33        | 38    | 44     | 4  | 12 |
| NP19                                    | VI                           | 46211                        | 4,7               | 4,8                                               | 633                                                          | 573                                          | NO                                                       | NO                 | 11            | 68        | 35    | 48     | 4  | 8  |
| NP20                                    | V                            | 32918                        | 4,5               | 4,5                                               | 748                                                          | 568                                          | NO                                                       | NO                 | 29            | 29        | 40    | 44     | 3  | 3  |
| NP21                                    | VI                           | 32473                        | 4,5               | 4,7                                               | 500                                                          | 652                                          | NO                                                       | NO                 | 2             | 32        | 35    | 41     | 4  | 7  |
| NP22                                    | VI                           | 116129                       | 5,1               | 4,8                                               | 671                                                          | 477                                          | NO                                                       | NO                 | 23            | 23        | 8     | 40     | 3  | 7  |
| NP23                                    | VI                           | 64454                        | 4,8               | 5,1                                               | 391                                                          | 492                                          | NO                                                       | NO                 | 29            | 29        | 14    | 55     | 3  | 8  |
| P01                                     | VI                           | 743                          | 2,9               | NA                                                | 619                                                          | NA                                           | YES                                                      | YES                | 1             | 68        | 49    | 49     | NA | NA |
| P02                                     | V                            | >500,000                     | >5,7              | NA                                                | 341                                                          | NA                                           | YES                                                      | YES                | 2             | 2         | 41FVE | 07     | 7  | 17 |
| P03                                     | V                            | 1,315                        | 3,1               | 3,5                                               | 504                                                          | 424                                          | YES                                                      | NO                 | 3             | 31        | 35.2  | 35.2   | 4  | 4  |
| P04                                     | VI                           | 3,662                        | 3,6               | 3,9                                               | 302                                                          | 281                                          | YES                                                      | NO                 | 2             | 33        | 14    | 15     | 2  | 8  |

|       |     |          |      |      |     |     |     |     |    |    |        |    |    |    |
|-------|-----|----------|------|------|-----|-----|-----|-----|----|----|--------|----|----|----|
| P05   | V   | 145,002  | 5,2  | NA   | 308 | NA  | YES | YES | 24 | 29 | 44CXHZ | 18 | 7  | 12 |
| P06   | III | >500,000 | >5,7 | NA   | 117 | NA  | YES | YES | 24 | 26 | 8      | 55 | 3  | 7  |
| P07   | IV  | >500,000 | >5,7 | NA   | 259 | NA  | YES | YES | 2  | 3  | 7      | 49 | 7  | 7  |
| P08b  | V   | >500,000 | >5,7 | 5,4  | 374 | 342 | YES | NO  | 2  | 30 | 18     | 18 | NA | NA |
| P09   | V   | 98,684   | 5,0  | 4,9  | 256 | 256 | YES | NO  | 2  | 11 | 18     | 35 | 4  | 7  |
| P11   | VI  | 242,199  | 5,4  | 5,6  | 161 | 70  | YES | NO  | 29 | 33 | 14     | 44 | 8  | 16 |
| P12   | IV  | >500,000 | >5,7 | >5,7 | 379 | 246 | YES | NO  | 2  | 2  | 40     | 44 | 3  | 3  |
| P13   | V   | >500,000 | >5,7 | 5,2  | 333 | 297 | YES | NO  | 24 | 68 | 14     | 53 | 4  | 8  |
| P14   | VI  | >500,000 | >5,7 | NA   | 475 | NA  | YES | YES | 11 | 24 | 7      | 39 | 7  | 7  |
| P15   | VI  | >500,000 | >5,7 | NA   | 104 | NA  | YES | YES | 2  | 11 | 35     | 40 | 3  | 4  |
| P16   | VI  | 199754   | 5,3  | NA   | 252 | NA  | YES | UNK | 24 | 68 | 14     | 53 | 4  | 8  |
| P17   | VI  | 255240   | 5,4  | 5,0  | 399 | 313 | YES | UNK | 2  | 68 | 14     | 35 | 4  | 8  |
| P18   | VI  | 283825   | 5,5  | NA   | 282 | NA  | YES | UNK | 2  | 68 | 39     | 41 | 7  | 7  |
| P19   | VI  | 102297   | 5,0  | NA   | 222 | NA  | YES | YES | 2  | 2  | 15     | 51 | 3  | 7  |
| PHI42 | V   | 1810     | 3,3  | NA   | 499 | NA  | UNK | UNK | 33 | 33 | 8      | 14 | 7  | 8  |
| PHI43 | VI  | 318838   | 5,5  | 5,3  | 655 | 563 | UNK | UNK | 32 | 32 | 44     | 49 | 7  | 18 |
| PHI44 | V   | 16926    | 4,2  | NA   | 801 | NA  | UNK | UNK | 2  | 23 | 44     | 57 | 4  | 6  |

**Chronics (C) N=16**

|                  |         |         |     |   |       |   |   |    |    |       |    |        |    |      |
|------------------|---------|---------|-----|---|-------|---|---|----|----|-------|----|--------|----|------|
| C01              | Chronic | 18,580  | 4,3 | - | 511   | - | - | NO | 1  | 3     | 7  | 37     | 7  | 7    |
| C02              | Chronic | 12,800  | 4,1 | - | 704   | - | - | NO | 2  | 36    | 7  | 42     | 7  | 7    |
| C03 <sup>6</sup> | Chronic | 1,286   | 3,1 | - | 1,071 | - | - | NO | 2  | 3     | 35 | 44     | 4  | 5    |
| C04              | Chronic | 22,060  | 4,3 | - | 293   | - | - | NO | 2  | 2     | 7  | 35     | 5  | 16   |
| C05 <sup>6</sup> | Chronic | 555     | 2,7 | - | 555   | - | - | NO | 3  | 3     | 18 | 18     | 7  | 7    |
| C06              | Chronic | 43,436  | 4,6 | - | 479   | - | - | NO | 31 | 31    | 15 | 39     | 3  | 7    |
| C07 <sup>6</sup> | Chronic | 1,288   | 3,1 | - | 431   | - | - | NO | NA | NA    | NA | NA     | NA | NA   |
| C08 <sup>6</sup> | Chronic | 1,817   | 3,3 | - | 689   | - | - | NO | 11 | 11    | 35 | 40     | 3  | 3    |
| C09              | Chronic | 45,199  | 4,7 | - | 282   | - | - | NO | 11 | 11    | 18 | 35     | 3  | 5    |
| C10              | Chronic | 3,093   | 3,5 | - | 227   | - | - | NO | 2  | 33    | 15 | 39     | 3  | 7    |
| C11              | Chronic | 11,026  | 4,0 | - | 585   | - | - | NO | 2  | 2     | 44 | 58     | 7  | 5/8* |
| C12              | Chronic | 85,947  | 4,9 | - | 25    | - | - | NO | 11 | 24    | 35 | 51/78* | 4  | 15   |
| C14              | Chronic | 22,475  | 4,4 | - | 143   | - | - | NO | 2  | 2/25* | 35 | 55     | 3  | 4    |
| C15              | Chronic | 14,784  | 4,2 | - | 139   | - | - | NO | 26 | 26    | 44 | 57     | 5  | 7    |
| C16              | Chronic | 253,164 | 5,4 | - | 5     | - | - | NO | 31 | 31    | 39 | 47     | 7  | 15   |
| C17              | Chronic | 36,399  | 4,6 | - | 555   | - | - | NO | 2  | 3     | 44 | 51     | 4  | 7    |

**Elite controllers(EC) N=11**

|      |         |     |      |   |     |   |   |    |   |   |    |    |   |   |
|------|---------|-----|------|---|-----|---|---|----|---|---|----|----|---|---|
| EC01 | Chronic | <50 | <1,7 | - | 566 | - | - | NO | * | * | 35 | 38 | 3 | 4 |
|------|---------|-----|------|---|-----|---|---|----|---|---|----|----|---|---|

|      |         |     |      |   |       |   |   |    |    |    |        |        |    |      |
|------|---------|-----|------|---|-------|---|---|----|----|----|--------|--------|----|------|
| EC02 | Chronic | <50 | <1,7 | - | 912   | - | - | NO | 2  | 2  | 13     | 51     | 12 | 16   |
| EC03 | Chronic | <50 | <1,7 | - | 456   | - | - | NO | 11 | 11 | 55/56* | 58     | 3  | 12   |
| EC04 | Chronic | <50 | <1,7 | - | 602   | - | - | NO | 3  | 31 | 7      | 39     | 7  | 7    |
| EC05 | Chronic | <50 | <1,7 | - | 570   | - | - | NO | 2  | 24 | 7      | 40     | 3  | 3    |
| EC06 | Chronic | <50 | <1,7 | - | 817   | - | - | NO | 33 | 66 | 14     | 42     | 8  | 17   |
| EC07 | Chronic | <50 | <1,7 | - | 389   | - | - | NO | 1  | 1  | 27     | 57     | 4  | 6    |
| EC08 | Chronic | <50 | <1,7 | - | 595   | - | - | NO | 33 | 68 | 40CXJJ | 52     | NA | NA   |
| EC09 | Chronic | <50 | <1,7 | - | 612   | - | - | NO | 01 | 02 | 57     | 40CXJJ | NA | NA   |
| EC10 | Chronic | <50 | <1,7 | - | 562   | - | - | NO | 25 | 32 | 44     | 58     | 7  | 5/8* |
| EC12 | Chronic | <50 | <1,7 | - | 1,261 | - | - | NO | 2  | 2  | 26     | 44     | 2  | 4    |

<sup>1</sup> PHI subjects were stratified according to Fiebig stages (Fiebig et al. 2003 AIDS, 17:1871-9). <sup>2</sup> For PHI subjects, data correspond to baseline samples. For Chronic and EC subjects, data correspond to samples obtained at enrollment. <sup>3</sup> Only applicable to PHI subjects. <sup>4</sup> States if CD4<sup>+</sup> T-cell count dropped below 350 cells/ $\mu$ l at any time during the first year post-infection. <sup>5</sup> Regarding PHI subjects, data illustrates if the subjects started HAART during the first year post-infection. For Chronic and ECs, data represents if subjects ever received HAART. <sup>6</sup> Subjects considered "Viremic Controllers" \*: Unable to resolve with current protocol. NA: Data not available. UNK: Data is unknown because time since enrollment was less than one year at the time of manuscript submission.
